# Supplementary material for: Championing awareness of the opioid epidemic through a service-learning module for non-STEM biology majors
Source: Frontiers journal article supplement (doi:10.3389/feduc.2023.1155659), 2023-12-06
Supplement: Table_2.docx [file Table_2.docx]

Example codes

____ do not know about the topic

____ likes biology

| Consented Student Number | **Pre** |
| --- | --- |
| **0** | I do not know anything about this topic. I like biology. |
| **54** | Opioid addiction being a big problem in the U.S. and Alabama in [indiscernible] does not surprise me even [indiscernible]… topic to begin with. |
| **91** | Although I do know that certain drugs have become more popular throughout the years, I don’t know what classifies as an “opioid”. If this includes hard drugs like heroin, meth, and pills, I believe these are more common now than they were in the past. There are several celebrities who have either overdosed on such drugs or who have gone through rehab to change their habits, like Demi Lovato. I think the relapse for opiate would be high and that opiates are a “happy” drug, so when a person feels depressed they may resort to it. Certain drugs and pills are mentioned in music and social media, but not in an effort to prevent use. If young people listen to music that discusses drugs in a “fun” way, highly susceptible people may fall into the pressure of also abusing the drugs. |
| 20 | I don’t know all that much about the opioid epidemic. I’m pretty sure that the state of Alabama is the number one on opioid using states. I know that opioids cause a lot of deaths. Opioids are usually over prescribed and it allows people to then become addicted to them. Opioids include any pain numbing drugs that can become addictive. |
| 50 | I do not know very much about the opioid epidemic. I do know people who have been addicted but I do not know the history on opioids or the cause. Knowing someone in the past who who were addicted, I am interested to know the history and how I can help others who are struggling with opioid addiction. |
| 26 | I’m not sure of the year but I do know the opioid epidemic was a big deal during the Vietnam war. That soldiers would transport drugs back and forth. I think it was a big deal even before this too. Not sure when but around 1900s? Maybe. As a social issue I think it was considered as a cool thing for rich people to do. They would have parties in opioid [indiscernible] and get high. My thought is the gov. got involved and used the money from the drugs to help pay for the war. (Could be wrong, just a conspiratory thought.) |
| 36 | I work very closely with the homeless community and so I understand that it effects them quite frequently. I believe heroin is an opioid and I know that it was created as the “heroes drug” and given to soldiers returning from war. Opioids effect the poor white community a significant amount. That, I believe, is all I know about opioids. |
| 69 | I disagree (do not) like opioid addiction because I disagree with the injections. You are given a certain amount of organisms and things in your body for a reason. I feel like opioid addiction may be common because people want to test new things, however, that’s not always what’s best for your body. I think just going to rehab and getting treatment should help, but, people need to stop with these unhealthy injections. |
| 55 | I don’t much about the opioid epidemic but I do know that opioids destroy many lives and many families. These drugs should not be on the street and people should not use them. But everyone needs to be aware of how to prevent and stop an overdose. More than just doctors and emergency response people. Doctors should be a lot more careful when prescribing such heavy drugs. A lot of people got addicted after being prescribed these drugs. |
| 32 | From what I’ve briefly learned about the opioid epidemic is that it is primarily taking over big cities. I learned in a class last semester that there are rehabs where they are still providing the patients with opioids in smaller doses to avoid serious problems with withdrawal. It is very easy to get addicted to opioids and extremely hard to stop taking once you get addicted. Doctors can only prescribe a certain amount for only a week or two and not longer than that actually need the medication. IT is not just affecting the normal “druggie” for this reason. Opioids are probably the strongest pain killer out there, and should only be prescribed in serious cases of pain. Many other doctors have been caught writing prescriptions for extra money under the counter, to addicts. |
| 15 | I know that opioid use has gotten worse over the years. I feel opioids are overly prescribed and people addicted know how to get their hands on it. I feel no one can help an addict who isn’t ready to help themselves. Most addicts who overdose get Narcan (?) injected to revive themselves which is probably why they don’t worry about it. A lot of addicts are associated or in relationships with other addicts which stops them from getting clean. Also some people don’t mean to get addicted but they are prescribed pain pills after surgeries so then they rely on them to feel better. There are many rehab treatment places to help ease the addicts off the drugs. |
| 53 | I really don’t know much about this issue but I do believe that this drug is highly addictive and that it is highly being used in certain medications. I am assuming that the drug is linked to causing many health problems that can possibly lead to death if left untreated. If this is true, there should be further research conducted on the drug to prevent it from being used in the pharmaceutical market, while creating other brands to accommodate removing this drug off the market. |
| 21 | I feel as if I know a little about the opioid addiction or crisis in America. I know that many people are suffering from it. I believe that it is the abuse or the overuse of prescribed medications. Things such as Xanax or any type of pill medication. I know that many go to like group sessions after being in rehab and they talk about their experiences with drug abuse. When someone goes without use of the drug for certain amounts of days they begin to get like medals for being “clean”. A person can relapse, which means to go back, when they start “using” again. Most times the patients face withdrawal effects. I know that there are multiple causes for the addiction. One of the main ways to see the opioid crisis is through television. One of the larges shows now; following the life of a teenage girl and her opioid addition is HBO’s Euphoria. |
| 51 | Doctors overprescribe opioids to patients for simple surgeries or chronic pain. The patients abuse their medications by taking them more than they are supposed to. They believe the only way to tolerate pain is taking opioids. This causes them to take them longer than necessary, causing an addiction. Overdosage of opioids is one of the leading causes of death in Alabama. Due to the epidemic, there will soon be emergency drugs everywhere (just like fire extinguishers) to revive addicts who overdose. Withdrawal symptoms include cold sweats, dizziness, nausea, and sometimes hallucinations. |
| 34 | The psychology behind it (I know very vaguely) is that they become dependent on this drug due to it being a booster in a way, allowing them to feel a different kind of high. I believe this is called an agonist. The before-hand addict is usually low-income, they tend to want some kind of release or control, but usually it’s the former. This is a very hard drug to overcome, and also tends to happen in little or less known towns. They can go to rehab if they seek help but they really need to want it since it can easily lead to relapse. Relapse is when an addict has been sober for more than a week and fall back into their habit. It’s a very hard addiction to get over with due to the intensity of it. |
| 86 | Opioids I feel are the easiest things to get addicted to. Lots of people get injuries that require you to be on pain medication. You give a person that’s totally clean a pill to take to relieve pain and they take this pill before pain ever exists. This causes this to get addicted on top of the [indiscernible] of them liking the feeling they get from it. Another thing could be peer pressure. Today’s rappers are all about popping “percs”. So to fit in hey take it not knowing the life long damage it causes. |
| 64 | I see the opioid crisis as a response to increase stress among the [indiscernible]. From small views of anxiety and nerves to the realization that a lot of bad things happening in the world could also affect yourself, many people look towards ways to relive stress. These opioids, commonly used to relieve stress, has sky rocketed due to the increase in shootings, racist propaganda, and all around terror seen in today’s media. Therea are probably better ways to solve this problem, but the most affective is to go to the source. Deal with the stressors rather than the stress. |
| 42 | I myself don’t know much about the crisis, but from what I understand people are abusing drugs to the point that they are overdosing. For me personally to combat this I would introduce more drugs such as weed and make it legal. I think most people would stop using other drugs in the midst of using weed which would cause the opioid epidemic to drop. You can’t stop someone from doing what they want to their body so offer them a safe drug that isn’t particularly harming them. |
| 11 | Like any drug addiction, the addict has to want to seek help. It cannot be a forced thing. It can be very hard to overcome. Why is it so common in America, specifically? What causes one to become an addict? I feel like I have read that rehab can be extremely difficult. |
| 63 | I have no knowledge about opioid, opium, or the crisis itself, however I do understand opium is a very addictive drug that has terrible effects on the body. I believe the crisis started back in China. I was informed that Alabama is top five in the most effected states. I assume there is treatment for opium addiction. |
| 73 | Opioids are addicting. They start as innocent pain relievers from doctors for recovering from surgery or for pain. Once the person takes pain relievers then it starts to become tempting for more. The doctor will only prescribe so much of it and then they will stop refilling your prescription. Once the prescription runs out, people turn to similar drugs like heroin or other pills that are dangerous and not regulated. They have to constantly do it everyday to reach that “high” which causes addiction to get stronger. Rehab is critical for these people to help them get clean from opioids again. Narcan can also help prevent from overdoses which is why it should be readily available. |
| 10 | Honestly I know nothing about the opioid epidemic. I never heard of the drug before. |
| 35 | I know that **Alabama** is one of the highest states for the opioid epidemic. I think it is due to doctors over prescribing these medicines for pain like if someone has arthritis. I know it’s a lot bigger of an issue because a lot of the opioid problems are behind the scenes. We could have a family member with an opioid addiction and have no idea that they are struggling. I know it’s a much under talked about problem in this world, and if there are not more ways to stop it, then it will continue to get worse. There are a lot of things we can do to help end the opioid epidemic, but I am honestly unsure of all the options there are to help. |
| 7 | Opioid addiction often tends to occur for people who are experiencing hardships mentally and emotionally and drugs become a way for them to cope with that. I think the psychology behind the person who is addicted is the culprit of their, at least initial, tendency toward drugs. The environment they are in is also a large factor. For instance, if a child sees their parent cope with the hardships of life through addiction, they are more likely to apply that “solution” too. This is also why drug addiction is so prevalent in places of poverty, where life is hard and taking drugs feels like an escape. |
| 68 | I know people get addicted after being prescribed painkillers in the hospital and then end up doing heroin. It takes over people’s lives and recovery is really hard. |
| 89 | It is a bigger epidemic than most people realize. People have a negative stigma against addicts, and think they aren’t worthy, even though they’re humans. Insulin users have become more upset that insulin costs more and is less accessible than Naloxone. Addicts are almost always in denial and commonly reject help from others. Addiction can be genetically pre-disposed in people. Opioid addiction usually begins post-op when people are given pain killers etc. They are highly addictive, and people begin to abuse them. A lot of people are miseducated on addiction. |
| 18 | The drug was suppose to be use to kill off black people. It wasn’t called a crisis until white people started using and got addicted. That’s when it became a worldwide issue. |
| 92 | It’s so bad that the government is taking and has free session on how to identify a overdose and for some people they can ask to be trained hoe to use kits to prevent the drug from continuing in their system. Such stuff like Narcan. |
| 74 | Opioids are in a lot of drugs. Mainly prescription. The epidemic is completely in the hands of our government. Drugs and healthcare make our country a fortune, and they will likely never get rid of either. |
| 84 | I do not know much about opioids except for the fact that you can get addicted to it and that is a major problem. You hear a lot of celebrities that die over opioid overdose and that in juvie cases doctors prescribe it to some patients. I know a lot of people do go to rehab for it. |
| 37 | • I know that there are drugs to bring them back.  • It’s a very bad problem that is affecting nearly all of the US. • Opioids came from opium, which is derived from the poppy flower.  • It is a depressant on the body.  • A lot of opioid addiction can start from a doctor from prescribing the medication. • Rehab helps but the addict may have relapses.  • Addicts try to hide it.  • When the prescriptions run out/are cut off, many may turn to the streets and get more dangerous drugs. |
| 56 | The opioid epidemic has been ravaging the United States for many years. It is something that is hard to regulate because some people genuinely need these drugs due to a condition, but then easily become addicted to these drugs. The patient sometimes doesn’t even realize that their body is addicted until they stop taking them and then have withdrawals. These withdrawals are so horrible that the patient will almost do anything to stop them from happening, including enabling their addiction further. This is a growing problem that needs to somehow be regulated. |
| 6 | The opioid epidemic has been rooted in society ruining people’s lives. Opioids come from the poppy plant mainly, but similarly leaves in South America have the same power. Poppy plants are found in eastern Asia and were brought over to America. Over time after that one poppy seed was planted, the roots of opium spread all throughout the country. |
| 67 | I do not know much on opioid addiction. I have more first-hand experience in drug addiction as a whole. I do know that it is a growing issue and may eventually lead to strict regulation on drugs that people need but cannot have in order to limit the opioid exposure. |
| 48 | I know that opioids come in many forms of drugs and that they are highly addictive. I also know that Alabama ranks as one of the top states for opioid addiction. The addiction is a very difficult thing to shake as your body becomes physically dependent on them. Because of those factors relapse rate is high. Opioids are a deadly substance that devastates the population every day. |
| 66 | I honestly know next to nothing about the opioid addiction crisis. I never watch the news, so I don’t hear about it through that. We discussed it a small bit in high school, but never in depth. The closest thing I got to any information about it was when my friend took this class last semester and did the project. I can assume that it is a very addictive drug that is affecting a lot of people, and that trying to get off of the drug is very difficult. But that is the extent of my knowledge about the subject. |
| 85 | I have learned that the opioid epidemic effects people everywhere, not just people who are “bad people” or people who have done other drugs. I have met someone who both their parents died due to their prescription opioids and these people were normal, high-functioning, successful adults. I’ve recently began watching a documentary about a doctor who prescribes an abnormally high amount of oxytocin and does not even evaluate her patients. They just wait in line and she gives them what they want. It is doctors like this that are truly at the heart of the epidemic. Other than this I am not very knowledgeable on the opioid epidemic. |
| 87 | Opioids are one the biggest upcoming epidemics in the world. More and more overdoses are occurring. Addiction is common among opioids and usually people start off “socially” and like the rush and starts doing it on their own. Some are prescribed and misused, other are dealed or stolen. |
| 33 | What I do know is that many people get addicted to opioids after receiving medical treatment. |
| 62 | My view of the opioid addicted is the main problem/leader of the addiction are the doctors. There have been many arrests of doctors overly prescribing or selling opioids for profit. The opioid addicted will only get worse if we don’t stop it at the roots, and it will start to effect many people around us. Since the drug is so easy to obtain it would be hard to stop it completely but implementing laws for users and sellers is the first step. |
| 29 | There aren’t enough treatment facilities. Some states have more than others, they’re far too overpriced to be reasonable. People that are able to come through and become sober struggle to maintain jobs because many places won’t hire them, especially if they have been arrested. They often struggle to find housing that they can afford or have a family. The crisis is rising, but Americans aren’t accepting it as a real health concern, that addicts don’t make the choice. |
| 58 | I don’t know anything about the opioid epidemic or anyone that has struggled with this addiction. I am excited to learn, though so that I can be a resource for people who struggle. |
| 81 | My mom has been addicted to opioids since I was three. Addiction is one of the hardest things to battle. It takes a lot to understand what is going on in someone who’s addicted minds. Rehab is a great tool for those who can afford it, but sadly the people most affected by the crisis are the one’s who are less likely to receive treatment. My mom would be sober for little bit at a time, but she would always relapse. I think the reason most people get addicted is to escape. My mom wanted to escape my dad and she found a release to do that. I think that’s why it is so hard for her to give it up. |
| 47 | From what I’ve learned in passing, I think the opioid epidemic really became a problem in the 80s or 90s. Generally, people get hooked because they’re prescribed some really strong pain meds after an injury or something and then they get addicted. I don’t know specifics about opioid addiction, but I do know a bit about addiction in general, and how if you’re not in treatment then you’re more likely to relapse and display behaviors of an addict, kind of like alcoholics who aren’t in treatment are “dry drunks”. I also… like most things, this epidemic probably disproportionately effects marginalized people. |
| 5 | I don’t know much on this to be honest. I’m aware is starting to become a larger problem affecting teenagers more now than in previous years. There is a lot of good social reform going around to help those recovering and prevent future addictions. |
| 83 | I am going to be honest. I have not truly followed this drug … because my parents do not want me thinking about that stuff. But I do believed the addiction is truly devastating, and hard for the parents to recover from because from my understanding, this drug is one of the easiest to receive. |
| 30 | To be honest, I don’t know much about opioid addiction. I haven’t heard much about it until I joined this class. I, myself, haven’t heard or seen news articles or social posts about it. I think the most I know is that it kills people and has expanded within recent years, but I’m not sure if I’m correct or not. |
| 61 | I do know that opioids are pills? I do not have a general understanding of the topic though. |
| 79 | I honestly don’t know much about it. My sister is a RN so I do know that people fail to realize how big of a problem it is. I know that the opioid epidemic is the reason why you can fill a prescription a certain amount of times. |
| 12 | I have heard of the growing trend of the opioid epidemic, but I’m not quite sure about the specifics or the details. I know that the use of opioids is romanticized in today’s song lyrics or his hip music. A lot of stars struggle with addiction, enter rehab consistently in today’s society, leading to more grown up usage. A lot of people in the hospital… are being treated for any kind of pain become addicted to the medication from the hospital because they have accused a substance amount and can receive refills. Once they cannot be prescribed anymore medication by law, they begin to look for it elsewhere: drug dealers, trade, etc. |
| 70 | I know that the opioid epidemic is one of the most pressing issues in our country, and over the past 30 years (I think) it has only been getting worse. Part of the problem is this crisis is caused by opioids being prescribed for pain that could be managed with less addicting medications. Word of mouth also helps push this crisis along because many people know that drugs like oxycotton and percocett will make you “feel high” which causes people to go to ER’s/doctors with levels of pain that they know they will get the medication. For instance, people know if they go to the ER and say that their pain level is a 6 or higher, they will get “strong” pain medication, so they are prone to lie about their true pain level in order to get something “better”. Also, most people aren’t aware that some pain medications make you itchy so they will automatically default to something they know by name. |
| 22 | I don’t know much about the opioid epidemic, but based on the name alone, it sounds quite interesting. I wonder if they have support groups for people with opioid addiction like they do with alcoholics, and I want to know how that affects them. I do feel that the opioid epidemic addiction is similar to any other drug addiction. Too much of anything is always a bad idea. I think social settings could also play a role. Sometimes, people only drink or smoke “socially”. Maybe that could be the same for eh opioid addicts and that could be how their addiction began. |
| 75 | I don’t know much about it but I know it messes people up. Maybe it’s caused when people get depressed, and they turn to drugs because they don’t know of anything else that can help them. Opioids are needed for patients, but there needs to be a way we can make sure they only take what is necessary. I heard that most people get their drugs from friends and family, and that’s hard for doctors to control. I think to recover, patients need to be given a stronger reason than why they started drugs to avoid relapsing once he/she has broken the addiction. |
| 25 | I do not know much about the opioid epidemic. I know opioids are pills and are often prescribed after surgery for pain management. This often leads to addiction when the patient had no intention of forming an addiction. There are many rehab facilities to help treat addiction. After patients leave rehab, they sometimes relapse. Patients that are recovering addicts often request to have zero meds given to them after surgery because they are scared of relapsing. |
| 19 | The opioid epidemic in America is an issue that I do not know well. I have however heard much about it in recent news. I do know that the addiction has led to an increase in children born addicted to opioids. I know that this has become a big concern in recent years and that new research and development has become important. I think that educating others and myself is essential to fighting the issue. I’m not sure how many resources are out there for patients who are addicted but I am sure the number has increased in recent years. |
| 45 | The opioid epidemic is one of the biggest crisis America is facing. But why do people get into it in the first place? In my opinion, emotional stability, easy access to the product, are one of the main problems. In the case of emotional stability in America, one often finds it difficult to seek medical help because of the huge medical expenses. In the case of Singapore of Switzerland, the government helps to cover a lot of their expense. In the case of easy access to the product, a person can easily get in contact with people who supply, but why are they selling these? its because they are not given a good stable job and therefore have to resort to it. |
| 90 | When I was in the eighth grade, I had a knee surgery and was given opiods for the pain. I know it used as a common pain killer after surgeries like that. I think that one cause of addiction after events like this is caused by not knowing the safe amount of how to take the drug. I’ve known that this a growing problem because once I was out of physical therapy, my mom flushed the remaining meds, knowing that people might try and take them from me. |
| 77 | I think that opioid addiction is the biggest crisis in america because its something a common person can get without many people knowing about it. I don’t know much about opioids, but I think they can be perscribed. Opioids aren’t illegal, but it is illegal if a person takes too many. I think that opioids can numb people from pain. I also believe that it causes many divorces in america and leads to families splitting up. I know that I mostly hear about the crisis of drugs such as, meth, heroine, cocaine, but I do not hear much about the opioid crisis. |
| 41 | I learned a little about the opiod epidemic during my honors seminar last semester, and a little more from reading the news. People are often prescribed opiods for injuries or recovery after a surgical procedure and don’t finish them. This puts opiods in the medicine cabinets and on the counters of people who no longer need them. They can be found and taken by addicts, thrill seeking teens, or used to self-medicate for things which shouldn’t require opiods. Someone who takes a relative or friend’s opiods without checking the dosage may overdose. People of low SES may be tempted to sell excess opiods to buy food or pay bills. Even people taking opiods as directed my become addicted as they develop a tolerance. |
| 76 | I don’t know much about opioids. In Alabama, I know opiod overdose is a big problem, but I don’t know how it got to be that way. There tends to be a negative connotation over opiods, & even though I don’t know much about them, I think that the public shouldn’t have access to them. Are they illegal? How do you get opiods? Is opiods a fancy name for a certain drug? I’m interested in learning more about them. I know it is hard to recover from opiod use, especially an overdose. |
| 59 | Opioid epidemic is a major problem because people think it will make them live happier. I Don’t know what the treatment is but if I had to guess I would say antibiotics. Opioid is very additive and once someone starts it is very hard to stop. It cause people to feel may emotions good and bad. Which makes people want more cause it numbs the pain of reality. |
| 8 | To be honest, I don’t know much about the details of the Opioid Epidemic. I know that it is worse than it has every been before, affecting more people every single day. I do know some people that have struggled with opioid use, some losing the battle. I believe that although there are resources in place, there could always be more we can do. One thing that I have picked up on is that opioid addiction affects more people than just the user–family and friends are also impacted. I also recall reading about a heavy presence of support groups for users/families of users in order to avoid relapse. |
| 43 | I think that opioid addiction is a major problem. Often, it is caused by gaining prescriptions following medical procedures. Whether people take opioids for recreation or prescription, it is undeniable that they are at risk for becoming addicted. As a daughter of someone who has been addicted to opioids, I know it is more common than people think. Once patients gain access to opioids, many chase the high. Addicts often have mindsets of hopelessness and find comfort in drugs. The truth is that opioid addiction cannot be overcome unless the addict genuinely wants sobriety and works with a support system. It is easy to relapse, but there are so many rehab resources available. This issue is something I am passionate about. |
| 3 | I think the biggest cause is how easy it is to get. Most form of opioids are given in the hospital after or before surgery to calm the pain of the patients. I believe people who start with any drug addiction such as opioids is a way to heal the pain using a form of narcodic. Once someone takes something that is known to cause addictions sparks a person to try it, and then become addicted. Most of the addictions start in someones head. Therefore the drugs errecting the trans intiess in ones mind, causing a serious problem making them addicted. This needs to become more serious. |
| 4 | History: first used as treatment for pain & injury; orginated from China. Cause: One time use of opoids can become addicting or a short term use can make people become dependent. Treatment for overdose is pumping stomach or swallowing charcoal substance given in hospital. Rehab is often needed for opoid addicts. Relapse is common. People who are trying to get clean must not surround themselves with other opoid users or they will surely fall back into old habits. |
| 46 | The opioid epidemic, to my knowledge, is the fastest growing epidemic in the US. Overdosing on opioids has become such a big problem that doctors are taking patients off of the strongest opioids (like fentanyl) because they don’t want to risk their patients becoming addicts. The most I know about opioids is that they are very effetive pain killers for those is chronic pain or who have recently had surgery. I know they are highly addictive because of how good they make people feel but I don’t know alot about how rehab for that addiction works. I would assume it’s the same as any other rehab program. |
| 80 | I know that the Opiod epidemic is bad but I didn’t know that it was so bad in Alabama. I’ve seen the commercials that talk about free rehab for opiod addiction and that those people need support and not to be criticized. This I think is true because people with this problem need help not to be shamed. I know from personal experience that it can be scary to see someone put themselves through rehab after its gotten so bad. |
| 27 | Opioid epidemic was probably caused by big pharma pushing the sale and use of certain drugs. Additionally, the opioid epidemic has resulted in plenty of deaths from overdoses. Opioids are usually some form of pain killers (medication) that are prescribed to patients after a surgery or anything that causes acute pain. Notably, celebrities such as Prince died of an opioid overdose. |
| 72 | Drugs are one of the biggest crises especially in America where opioid Epidemic is one of the biggest crisis. Drug abuse is not tolerable at all. Consuming of drugs can lead to end of life which is something one would not like or even other wont be able to at all. Opioid epidemic is highly addictive and banned totally. The risk to life endangerment and. It always |
| 28 | The only information I really know is opioid Addiction is a big problem in the state of Alabama. The Opioid Epidemic situation is something that can be dangerous to your health. It not only affects you but, it has a major Impact on how you act around others. There are several programs and Rehab facilities that are able to treat people with the addiction. I think if you are able to get the help you Need, Take advantage of it. The main objective is you must take the program seriously to get clean because, If you play around you might have a relapse and go back to taking drugs. Another thing I knew prior to this is a lot of young-aged (Teenagers) are a big factor of the Opioid Epidemic. |
| 71 | What I know about the Opioid Addiction is that a lot of People have died because of drug overdose. I know that some People go to rehab to help with treating the addiction. Sometimes when People become hooked on Opioids, they are going through a rough time or are surrounded by it. When they relapse it’s because something has happened and they feel the need to fight what they are going through with opioids. |
| 78 | I do not know much about opiod addiction. I know that they are commonly prescribed and highly addictive which contributes to the epidemic. Treatment and Rehab would be similar to any other drug addiction and would force the addict to go though withdrawl. Patients are often unaware of how easily you can become addicted and that contributes to the issue. These drugs are more acceptable to society compared to heroin or meth therefore increasing the epidemic. Patients can receive help from Rehabilitation Clinics and hospitals. |
| 65 | - common issue among the poor and minority groups. - social issues: people are locked down about it and instead of helping them shame them causing them to not seek help. - bigger issue than most people realize. - could have started with other drugs and then wanted more of a high and went into stronger drugs. - Don’t know a lot about the treatment or resources for people. |
| 9 | I am not very familiar with this problem. I have heard that it is a wide spread epidemic, especially in Alabama. My older sister is a nurse and she keeps a naloxone kit in her car incase she needs to revive someone who has overdosed. I have had family members who were recently sent home from having surgery with very little pain medications prescribed to them. Doctors are trying to crack down on opioide addiction, therefore they are not prescribing it as much. I know opioids are highly addictive. I personally know people who have overdosed. I also think it is pretty common for people to experience some pain of a relapse within the first two-years of their rehabilitation. It is Probably difficult for People to tell others if they are experiencing an opioid addiction because they might fear being judged. |
| 31 | I don’t know much about the Opioid Epidemic aside from what you have stated in class. I know that is a problem and that many people have not heard of it. Opioid is the third largest killer in the State of Alabama. I am interested in learning more about this and how it affects people. I also would like to learn about what started it and what causes it. Is it something that can be accessed anywhere? Is it something we eat without knowledge? What type of long term affects does it have on your body? |
| 14 | I have always heard it was a big problem, especially in Alabama, but I do not know much of anything about its history or causes or treatments. I know that opiods are very dangerous, but I don’t know why or how. |
| 52 | Opioids are drugs that if used very frequently can cause serious harm to a person or potentially death. Opioids are over the counter drugs that can be very addictive. Opioid addiction is one of the leading causes of death in the United States today. I do not personally know anyone who has or has had an opioid addiction, all I know is that is it is a serious problem in the United States and potentially down the line to the whole world. |
| 49 | - I know a lot about the opiod epidemic because both of my parents are pharmacists and our family has problems with addiction. My grandmother was addicted to norco for the longest time until she almost overdosed and got help. Also in my family my 1st cousin got addicted to heroin. It was quite a process for him to quit using and it tought me just how much these drugs ruin peoples lives. My family is from Kentucky and Alabama two states that are extremely affected by the epidemic so I understand how devastating it can be. |
| 24 | I don’t know so much about Opiods/Opiod addiction in America because I am an international student. But I know that Opiods are prescribed by doctors most times for men (and not women) to help with pain relief. In addition, I know that nolaxone kits can be used to treat a person who has an attack/passes out. Opiods are usually tablets (I think) and are usually abused by people to feel high. Opiods just like any other drugs are addictive, and most patients usually do not seek help. When they eventually get help, they experience withdrawal syndrome. |
| 82 | HISTORY: OPIOID EPIDEMIC STARTED WHEN DOCTORS BEGAN PRESCRIBING MORE OPIOIDS TO TREAT PAIN THAN OTHER NON ADICTIVE MEDICATION. DOCTORS/NURSES BEGAN USING A PAIN SCALE FOR THEIR PATIENTS TO SEE WHAT THE BEST COURSE OF ACTION WOULD BE. DOCTORS WOULD PRESCRIBE LARGE AMOUNTS LIKE 60 PILLS FOR 30 DAYS & THAT WOULD CREATE AN ADDICTION. ONCE PATIENTS ARE ADDICTED & THEY CAN’T GET MORE, THEY TURN TO DRUGS LIKE HEROIN.  TREATMENT: 12 STEP PROGRAMS, DRUG REHABS, NA GROUPS, CBD??, COUNSELING  RELAPSE: EXTREMELY COMMON IN FIRST YEAR OF TREATMENT. ADDICTION IS A DISEASE. IT CANNOT BE CURED, BUT IT CAN BE HELPED.  SOCIAL ISSUES: MORE PEOPLE ARE NEEDING REHAB WHICH COSTS MONEY. STIGMA; HARD FOR ADDICTS/FORMER ADDICTS TO GET JOBS. PEOPLE OD’ING & DYING ON THE STREETS. UNINSURED PEOPLE IN HOSPITALS |
| 60 | Drug abuse always is a problem in the USA and apart of a fab/moment. I feel like the pharmacy companies are taking advantage for money |
| 13 | I honestly know nothing about opioid addiction. |
